# Supplementary material for: A protocol for rapid generation cycling (speed breeding) of hemp (Cannabis sativa) for research and agriculture
Source: PubMed Central journal article supplement — Plant J. 2022 Dec 20;113(3):437–45. doi: 10.1111/tpj.16051 (PMC10108250; doi:10.1111/tpj.16051), 2022-12-20
Supplement: TPJ-113-437-s002.pdf [file TPJ-113-437-s002.pdf]

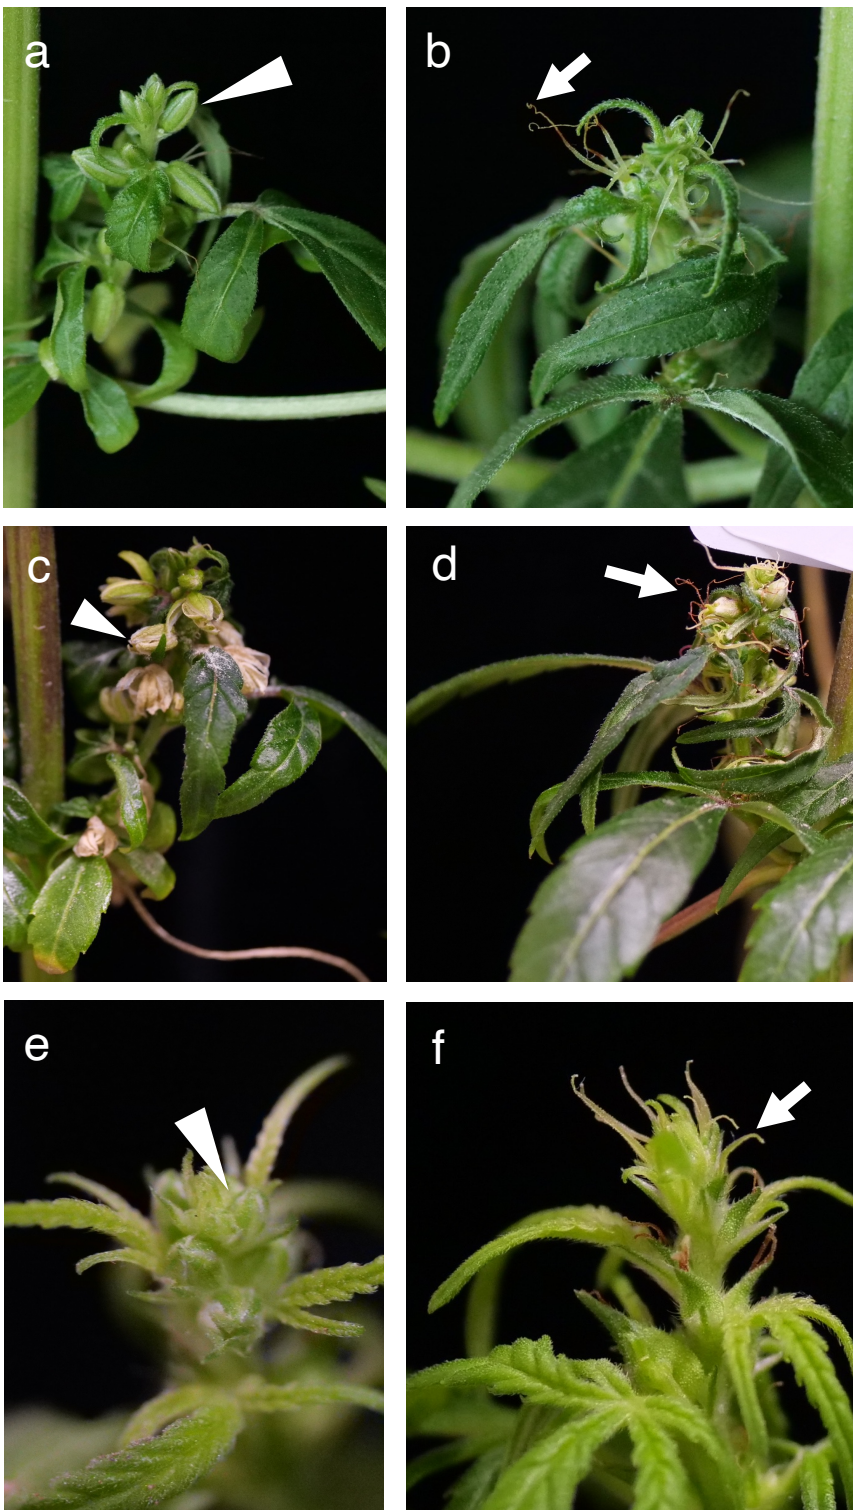

**Figure S5. Treatment of monoecious and dioecious hemp plants with aqueous silver nitrate induces the development male flowers.** Inflorescences of a monoecious (a-d) and a dioecious female (e-f) hemp plant after treatment with aqueous silver nitrate solution (a, c, e) and water control (b, d, f). Inflorescences treated with silver nitrate develop predominantly male flowers (white arrowheads). In contrast, inflorescences treated with water as a control develop predominantly female flowers displaying characteristic stigmata (white arrow).
