# Supplementary material for: A protocol for rapid generation cycling (speed breeding) of hemp (Cannabis sativa) for research and agriculture
Source: PubMed Central journal article supplement — Plant J. 2022 Dec 20;113(3):437–45. doi: 10.1111/tpj.16051 (PMC10108250; doi:10.1111/tpj.16051), 2022-12-20
Supplement: TPJ-113-437-s003.pdf [file TPJ-113-437-s003.pdf]

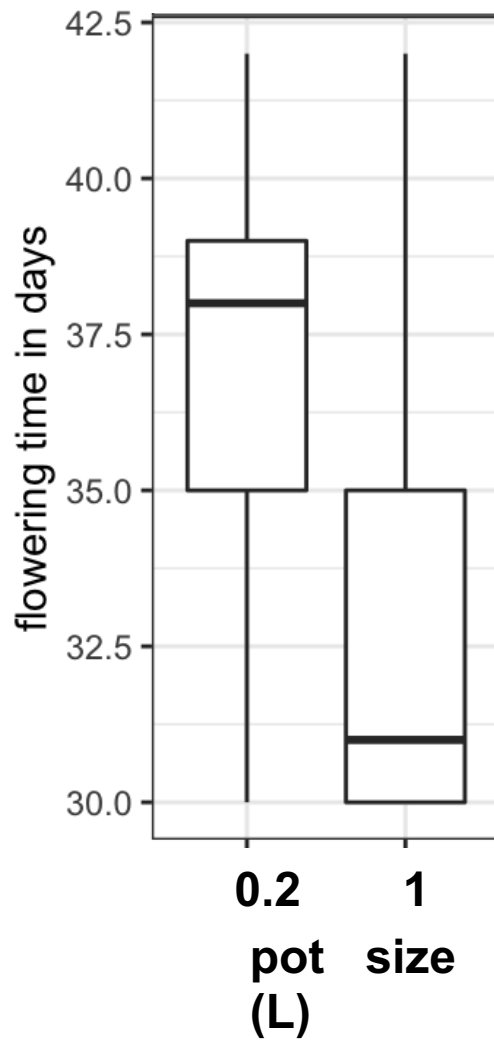

**Figure S3. Pot size influences flowering time.** Hemp plants of the cultivar 'Fedora 17' flowered significantly later when pot size was 0.2 l as opposed to plants cultivated in 1 l pots ( $p < 0.01$ ).
