# Supplementary material for: A protocol for rapid generation cycling (speed breeding) of hemp (Cannabis sativa) for research and agriculture
Source: PubMed Central journal article supplement — Plant J. 2022 Dec 20;113(3):437–45. doi: 10.1111/tpj.16051 (PMC10108250; doi:10.1111/tpj.16051), 2022-12-20
Supplement: TPJ-113-437-s004.pdf [file TPJ-113-437-s004.pdf]

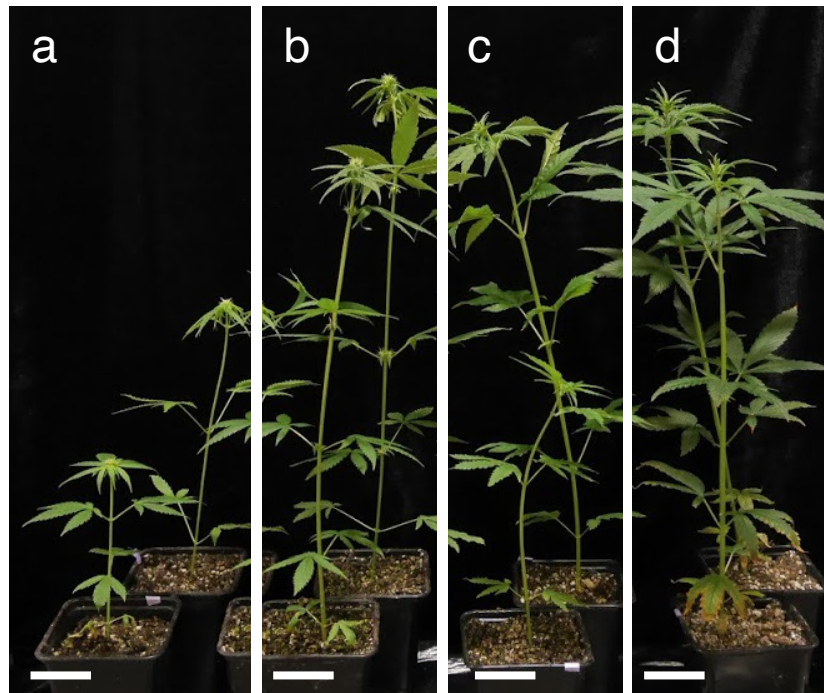

**Figure S2. Hemp plants grown under different light conditions are different in size.** Hemp plants of the cultivar ‘Fedora 17’ accumulate less biomass and are less durable if grown under ultra-short days with only 8 hours of light (a) as opposed to plants grown under 12 hours of light (b), plants grown under 16 hours of light (c) and plants grown under continuous light (d).
