# Supplementary material for: A protocol for rapid generation cycling (speed breeding) of hemp (Cannabis sativa) for research and agriculture
Source: PubMed Central journal article supplement — Plant J. 2022 Dec 20;113(3):437–45. doi: 10.1111/tpj.16051 (PMC10108250; doi:10.1111/tpj.16051), 2022-12-20
Supplement: TPJ-113-437-s005.pdf [file TPJ-113-437-s005.pdf]

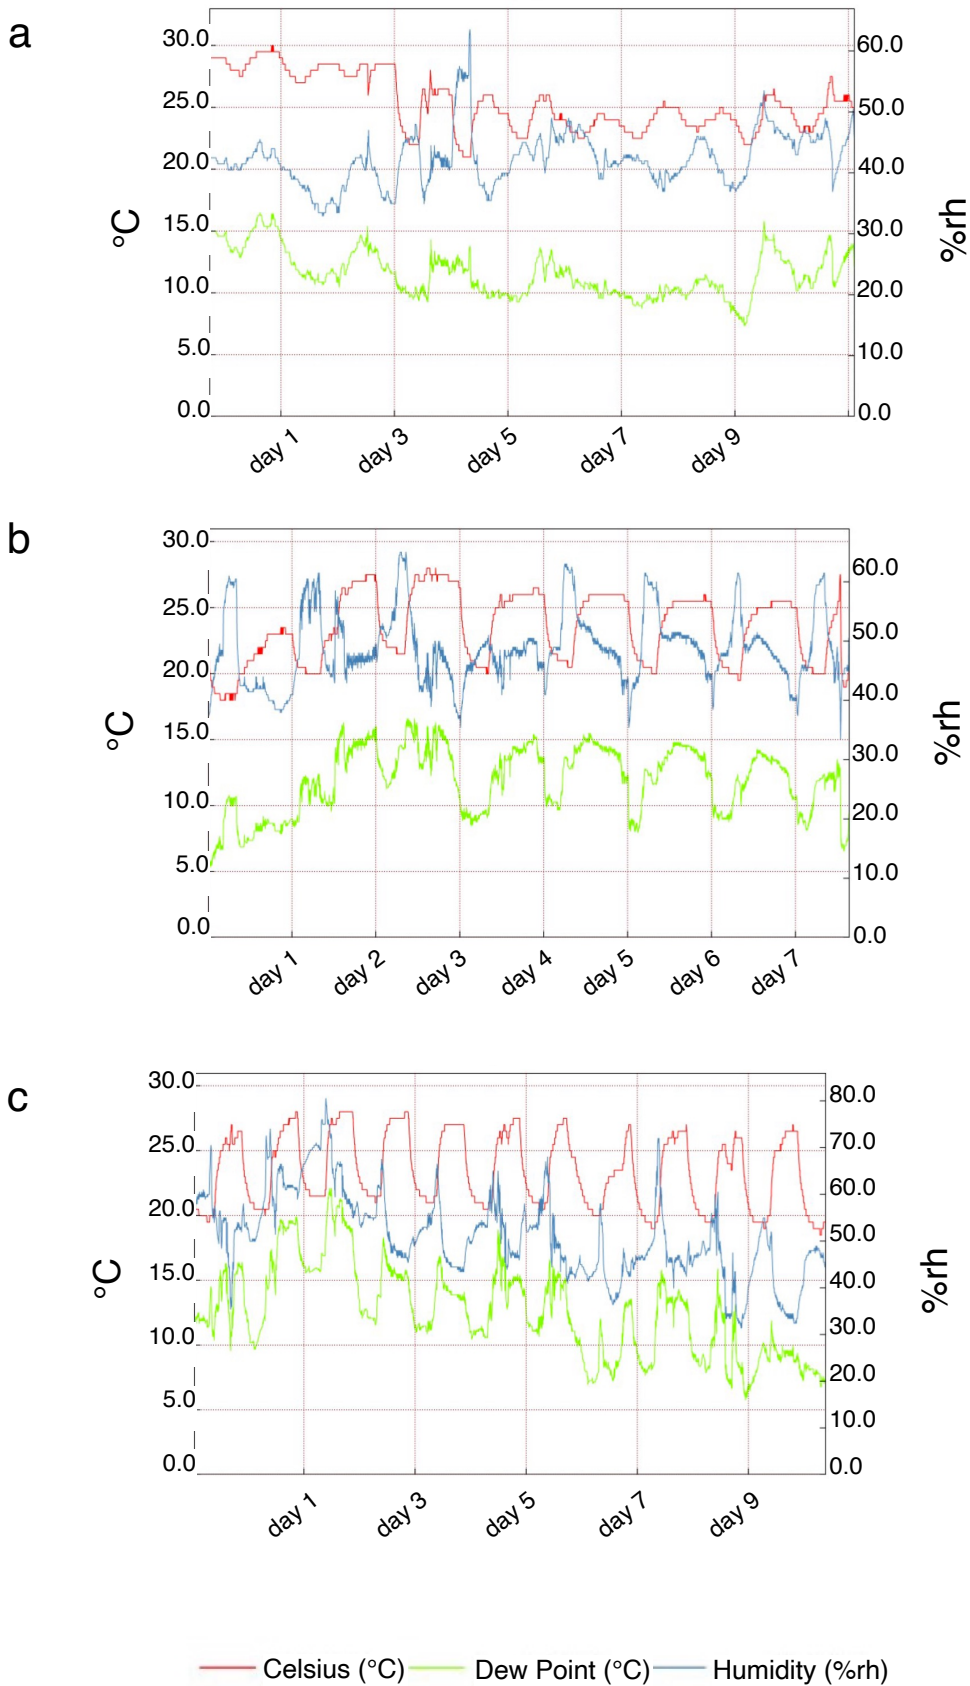

**Figure S1. Temperature and humidity records.** Measurements were recorded on 17 consecutive days (at least 5 for each light regime), which are representative of the overall experimental conditions for 24 hours of continuous light (a), 16 hours of light (b) and 12 hours of light (c).
